9. Reitman, S., and Frankel, S.: A colorimetric method for the determination of serum glutamic oxaloacetic and glutamic pyruvic transaminase, *Amer. J. Clin. Path.* 28: 56, 1957.
10. Green, M. N., Tsou, K.-C., Bressler, R., and Seligman, A. M.: The colorimetric determination of leucine aminopeptidase activity with L-leucyl- $\beta$ -naphthylamide hydrochloride, *Arch. Biochem.* 57: 458, 1955.
11. Bell, J. K., and Baron, D. N.: Colorimetric estimation of serum isocitric dehydrogenase, *J. Clin. Path.* 12: 582, 1959.
12. Silbey, J. A., and Lehninger, A. H.: Determination of aldolase in animal tissues, *J. Biol. Chem.* 177: 859, 1949.
13. Seldinger, S. I.: Catheter replacement of the needle in percutaneous arteriography: A new technique, *Acta Radiol.* 39: 368, 1953.
14. Molnar, C. E., Weiss, T. F., and Geisler, C. D.: Processing neuroelectrical data, Editorial by W. A. Rosenblith. Cambridge, Mass., M. I. T. Press, 1962.
15. Hubbard, R. W., and Metcalf, D. R.: Proc. Symposium on Biological and Medical Engineering, Marquette University, Milwaukee, June 24-25, 1966, vol. 1, p. 312.
16. Falls, H. F., Hoy, J. E., and Corsen, G.: CI-581: An intravenous or intramuscular anesthetic for office ophthalmic surgery, *Amer. J. Ophthalmology* 61: 1093, 1966.
17. Chang, T., Dill, W. A., and Glazko, A. N.: Metabolic disposition of 2-(O-chlorophenyl)-2-methylamino cyclohexanone HCl (CI-581) in laboratory animals and in man, *Fed. Proc.* 24: 268, 1965, Abstract 770.

## Anesthesia

**SPINAL HYPERTENSION** An elderly male patient, scheduled to have a lower limb amputation, was given a spinal anesthetic accompanied by 50 mg. ephedrine intramuscularly as a prophylactic vasopressor. As the anesthetic level reached T-10, the blood pressure rose from 160 to 340 mm. of mercury systolic, and the patient complained of headache. Treatment with thiopental and meperidine were to no avail, but an infusion of trimetaphan (Arfonad) lowered the systolic pressure to 140 mm. of mercury and relieved the symptoms. It was then learned that the patient had been receiving 100 mg. of nialamide *t.i.d.* the day before surgery, so that the action of ephedrine was unopposed due to monoamine oxidase inhibition. Phen-tolamine is recommended for treatment of hypertension of this etiology, but trimetaphan is also effective. Monoamine oxidase inhibitors may also interfere with hydrolysis of other drugs such as narcotics and alcohol and thus potentiate their action too, especially producing respiratory depression. (*Clinical Anesthesia Conference: Hypertension Following Use of Monoamine Oxidase Inhibitor*, New York *J. Med.* 67: 570 (Feb.) 1967.)

**AXILLARY BLOCK AND DIALYSIS** Heretofore the insertion of arteriovenous shunts using local infiltration has been made difficult by the occurrence of vascular spasm. The changing caliber of the vessels has resulted in leakage and diminished flow at the shunt, necessitating frequent revisions. To obviate these difficulties and to permit more adequate cannulas to be employed, blocking of the brachial plexus was initiated. This technique, using the axillary approach, was undertaken on 30 cases. The resultant vasodilation and analgesia facilitated operation appreciably. Infrared photography and thermographic examination substantiating the clinical findings were done. Axillary block of the brachial plexus is regarded the method of choice for this procedure, providing excellent working conditions for the surgeons with a minimum of risk and discomfort for the patient. (*Urban, J. B., and others: Axillary Block and Dialysis*, *J.A.M.A.* 199: 889 (March) 1967.)
